# Supplementary material
Source: PubMed Central journal article supplement (PMC9814791)
Supplement: 43856_2022_233_MOESM2_ESM.pdf [file 43856_2022_233_MOESM2_ESM.pdf]

## **Description of Additional Supplementary Files**

**File Name:** Supplementary Data 1

**Description:** The aggregate dataset for all Tables and Figures
